# Supplementary material for: Tripeptidyl Peptidase 1 (TPP1) Deficiency in a 36-Year-Old Patient with Cerebellar-Extrapyramidal Syndrome and Dilated Cardiomyopathy
Source: MDPI journal article supplement (doi:10.3390/life12010003), 2021-12-21
Supplement: s1 [file s1]

## Supplementary material of Tripeptidyl Peptidase 1 (TPP1) Deficiency in a 36-Year-Old patient with Cerebellar-Extrapyramidal Syndrome and Dilated Cardiomyopathy

Video S1: Steady-state free precession four-chamber cine demonstrating severe wall motion abnormalities of the left and the right ventricle.
